# Supplementary material for: Capsaicin stability and bio-accessibility affected by complexation with high-amylose corn starch (HACS)
Source: Royal Society of Chemistry journal article supplement (doi:10.1039/d1fo00258a), 2021-01-01
Supplement: d1fo00258a1.pdf [file d1fo00258a1.pdf]

Capsaicin stability and bio-accessibility via complexation with high-amylose corn  
starch (HACS)

Sivan Isaschar-Ovdat, Carmit Shani-Levi and Uri Lesmes\*

*Department of Biotechnology and Food Engineering, Technion-Israel Institute of  
Technology, Haifa 32000, Israel*

Figure S1

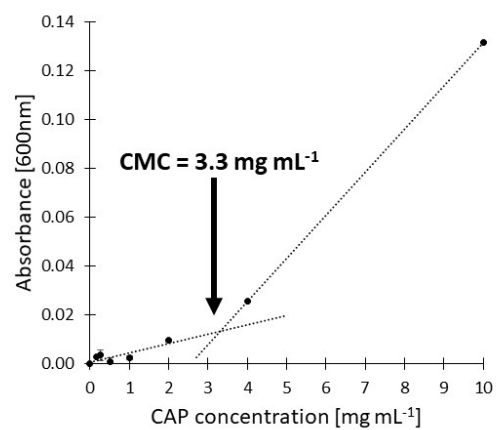

7

**Figure S1:** CAP absorbance at 600nm in 0.1 M KOH pH= 13.5. CAP critical micelle concentration was determined by the slope intercept at 3.3 mg mL<sup>-1</sup>.
